# Supplementary material
Source: MDPI journal article supplement (https://www.mdpi.com/2072-4292/8/2/100)
Supplement: s1 [file s1 › doc.kml]

<?xml version="1.0" encoding="UTF-8"?>
<kml xmlns="http://www.opengis.net/kml/2.2" xmlns:gx="http://www.google.com/kml/ext/2.2" xmlns:kml="http://www.opengis.net/kml/2.2" xmlns:atom="http://www.w3.org/2005/Atom">
<Document>
	<name>Philippines_black_sand_mining.kmz</name>
	<Style id="s_ylw-pushpin_hl1204">
		<IconStyle>
			<scale>1.18182</scale>
			<Icon>
				<href>http://maps.google.com/mapfiles/kml/shapes/open-diamond.png</href>
			</Icon>
		</IconStyle>
		<LabelStyle>
			<color>ff0080ff</color>
			<scale>0.5</scale>
		</LabelStyle>
	</Style>
	<Style id="s_ylw-pushpin2305">
		<IconStyle>
			<Icon>
				<href>http://maps.google.com/mapfiles/kml/shapes/open-diamond.png</href>
			</Icon>
		</IconStyle>
		<LabelStyle>
			<scale>0.5</scale>
		</LabelStyle>
	</Style>
	<Style id="s_ylw-pushpin_hl12040">
		<IconStyle>
			<scale>1.18182</scale>
			<Icon>
				<href>http://maps.google.com/mapfiles/kml/shapes/open-diamond.png</href>
			</Icon>
		</IconStyle>
		<LabelStyle>
			<scale>0.5</scale>
		</LabelStyle>
	</Style>
	<Style id="s_ylw-pushpin_hl123">
		<IconStyle>
			<color>ff0000ff</color>
			<scale>1.18182</scale>
			<Icon>
				<href>http://maps.google.com/mapfiles/kml/shapes/open-diamond.png</href>
			</Icon>
		</IconStyle>
		<LabelStyle>
			<scale>0.5</scale>
		</LabelStyle>
	</Style>
	<StyleMap id="m_ylw-pushpin0304">
		<Pair>
			<key>normal</key>
			<styleUrl>#s_ylw-pushpin23051</styleUrl>
		</Pair>
		<Pair>
			<key>highlight</key>
			<styleUrl>#s_ylw-pushpin_hl1204</styleUrl>
		</Pair>
	</StyleMap>
	<StyleMap id="m_ylw-pushpin033">
		<Pair>
			<key>normal</key>
			<styleUrl>#s_ylw-pushpin2330</styleUrl>
		</Pair>
		<Pair>
			<key>highlight</key>
			<styleUrl>#s_ylw-pushpin_hl123</styleUrl>
		</Pair>
	</StyleMap>
	<Style id="s_ylw-pushpin_hl12041">
		<IconStyle>
			<scale>1.18182</scale>
			<Icon>
				<href>http://maps.google.com/mapfiles/kml/shapes/open-diamond.png</href>
			</Icon>
		</IconStyle>
		<LabelStyle>
			<color>ffffff00</color>
			<scale>0.5</scale>
		</LabelStyle>
	</Style>
	<StyleMap id="m_ylw-pushpin03041">
		<Pair>
			<key>normal</key>
			<styleUrl>#s_ylw-pushpin23052</styleUrl>
		</Pair>
		<Pair>
			<key>highlight</key>
			<styleUrl>#s_ylw-pushpin_hl12042</styleUrl>
		</Pair>
	</StyleMap>
	<Style id="s_ylw-pushpin2330">
		<IconStyle>
			<color>ff0000ff</color>
			<Icon>
				<href>http://maps.google.com/mapfiles/kml/shapes/open-diamond.png</href>
			</Icon>
		</IconStyle>
		<LabelStyle>
			<color>ff0080ff</color>
			<scale>0.5</scale>
		</LabelStyle>
	</Style>
	<StyleMap id="m_ylw-pushpin03040">
		<Pair>
			<key>normal</key>
			<styleUrl>#s_ylw-pushpin23050</styleUrl>
		</Pair>
		<Pair>
			<key>highlight</key>
			<styleUrl>#s_ylw-pushpin_hl12041</styleUrl>
		</Pair>
	</StyleMap>
	<Style id="s_ylw-pushpin_hl12042">
		<IconStyle>
			<scale>1.18182</scale>
			<Icon>
				<href>http://maps.google.com/mapfiles/kml/shapes/open-diamond.png</href>
			</Icon>
		</IconStyle>
		<LabelStyle>
			<scale>0.5</scale>
		</LabelStyle>
	</Style>
	<Style id="s_ylw-pushpin23050">
		<IconStyle>
			<Icon>
				<href>http://maps.google.com/mapfiles/kml/shapes/open-diamond.png</href>
			</Icon>
		</IconStyle>
		<LabelStyle>
			<color>ffffff00</color>
			<scale>0.5</scale>
		</LabelStyle>
	</Style>
	<Style id="s_ylw-pushpin23051">
		<IconStyle>
			<Icon>
				<href>http://maps.google.com/mapfiles/kml/shapes/open-diamond.png</href>
			</Icon>
		</IconStyle>
		<LabelStyle>
			<color>ff0080ff</color>
			<scale>0.5</scale>
		</LabelStyle>
	</Style>
	<Style id="s_ylw-pushpin23052">
		<IconStyle>
			<Icon>
				<href>http://maps.google.com/mapfiles/kml/shapes/open-diamond.png</href>
			</Icon>
		</IconStyle>
		<LabelStyle>
			<scale>0.5</scale>
		</LabelStyle>
	</Style>
	<StyleMap id="m_ylw-pushpin03042">
		<Pair>
			<key>normal</key>
			<styleUrl>#s_ylw-pushpin2305</styleUrl>
		</Pair>
		<Pair>
			<key>highlight</key>
			<styleUrl>#s_ylw-pushpin_hl12040</styleUrl>
		</Pair>
	</StyleMap>
	<Folder>
		<name>Philippines_black_sand_mining</name>
		<Folder>
			<name>InSAR_black_sand_mining_sites</name>
			<Placemark>
				<name>InSAR site 6 - subs 2.6</name>
				<LookAt>
					<longitude>120.6085315410995</longitude>
					<latitude>14.66615767244615</latitude>
					<altitude>0</altitude>
					<heading>-0.4861916560462546</heading>
					<tilt>0</tilt>
					<range>45523.83877549729</range>
					<gx:altitudeMode>relativeToSeaFloor</gx:altitudeMode>
				</LookAt>
				<styleUrl>#m_ylw-pushpin033</styleUrl>
				<Point>
					<gx:drawOrder>1</gx:drawOrder>
					<coordinates>120.5603002293756,14.69348942914898,0</coordinates>
				</Point>
			</Placemark>
			<Placemark>
				<name>InSAR site 3 - subs 1.8</name>
				<Camera>
					<longitude>120.1185315863475</longitude>
					<latitude>15.54887735850638</latitude>
					<altitude>14425.44412849084</altitude>
					<heading>0.006375362019546701</heading>
					<tilt>5.647407881847633</tilt>
					<roll>0.8074488460836635</roll>
					<gx:altitudeMode>relativeToSeaFloor</gx:altitudeMode>
				</Camera>
				<styleUrl>#m_ylw-pushpin033</styleUrl>
				<Point>
					<gx:drawOrder>1</gx:drawOrder>
					<coordinates>120.0938309282174,15.57146142744593,0</coordinates>
				</Point>
			</Placemark>
			<Placemark>
				<name>InSAR site 1 - subs 2.5</name>
				<LookAt>
					<longitude>120.4583862585719</longitude>
					<latitude>17.35939330935405</latitude>
					<altitude>0</altitude>
					<heading>0.006702714758771875</heading>
					<tilt>20.1651937087077</tilt>
					<range>1093.098260338838</range>
					<gx:altitudeMode>relativeToSeaFloor</gx:altitudeMode>
				</LookAt>
				<styleUrl>#m_ylw-pushpin033</styleUrl>
				<Point>
					<gx:drawOrder>1</gx:drawOrder>
					<coordinates>120.4565400774409,17.36160468121053,0</coordinates>
				</Point>
			</Placemark>
		</Folder>
		<Folder>
			<name>Black sand mining sites no subsidence</name>
			<Placemark>
				<name>site17 bauang - no subsidence</name>
				<description>permit: 2007 approval
location: approximate</description>
				<LookAt>
					<longitude>120.3136715954599</longitude>
					<latitude>16.50006316274287</latitude>
					<altitude>0</altitude>
					<heading>-0.005721676568528453</heading>
					<tilt>7.424508162790057</tilt>
					<range>6292.403873425906</range>
					<gx:altitudeMode>relativeToSeaFloor</gx:altitudeMode>
				</LookAt>
				<styleUrl>#m_ylw-pushpin03040</styleUrl>
				<Point>
					<gx:drawOrder>1</gx:drawOrder>
					<coordinates>120.3127816532687,16.51835604919525,0</coordinates>
				</Point>
			</Placemark>
			<Placemark>
				<name>site16 sto tomas - no subsidence</name>
				<description>permit: 2007 approval
location: approximate</description>
				<LookAt>
					<longitude>120.3938890028432</longitude>
					<latitude>16.2636110029257</latitude>
					<altitude>0</altitude>
					<heading>7.96257430475084e-10</heading>
					<tilt>0</tilt>
					<range>11436.77443361322</range>
					<gx:altitudeMode>relativeToSeaFloor</gx:altitudeMode>
				</LookAt>
				<styleUrl>#m_ylw-pushpin03040</styleUrl>
				<Point>
					<gx:drawOrder>1</gx:drawOrder>
					<coordinates>120.3938890028433,16.2636110029257,0</coordinates>
				</Point>
			</Placemark>
			<Placemark>
				<name>site 14 - no subsidence</name>
				<description>permit: 2007 approval
location: approximate</description>
				<LookAt>
					<longitude>120.4612716156412</longitude>
					<latitude>17.01771798738175</latitude>
					<altitude>0</altitude>
					<heading>-0.003937631255245337</heading>
					<tilt>10.20617840419906</tilt>
					<range>4831.263462666363</range>
					<gx:altitudeMode>relativeToSeaFloor</gx:altitudeMode>
				</LookAt>
				<styleUrl>#m_ylw-pushpin03040</styleUrl>
				<Point>
					<gx:drawOrder>1</gx:drawOrder>
					<coordinates>120.4510013531263,17.01778025870802,0</coordinates>
				</Point>
			</Placemark>
			<Placemark>
				<name>site11 tagudin city - no subsidence</name>
				<description>permit: 2007 approval
location: approximate</description>
				<LookAt>
					<gx:TimeSpan>
						<begin>2008-05-31T23:59:59Z</begin>
						<end>2008-06</end>
					</gx:TimeSpan>
					<gx:ViewerOptions>
						<gx:option name="historicalimagery"></gx:option>
						<gx:option enabled="0" name="sunlight"></gx:option>
						<gx:option enabled="0" name="streetview"></gx:option>
					</gx:ViewerOptions>
					<longitude>120.4395690056938</longitude>
					<latitude>16.93959091145757</latitude>
					<altitude>0</altitude>
					<heading>-0.003046775831027903</heading>
					<tilt>19.69061498427529</tilt>
					<range>4828.728755187998</range>
					<gx:altitudeMode>relativeToSeaFloor</gx:altitudeMode>
				</LookAt>
				<styleUrl>#m_ylw-pushpin03040</styleUrl>
				<Point>
					<gx:drawOrder>1</gx:drawOrder>
					<coordinates>120.4355906730382,16.94099331869429,0</coordinates>
				</Point>
			</Placemark>
		</Folder>
		<Folder>
			<name>Mean_velocity_map</name>
			<GroundOverlay>
				<name>T450</name>
				<color>c4ffffff</color>
				<Icon>
					<href>files/T450_1.png</href>
					<viewBoundScale>0.75</viewBoundScale>
				</Icon>
				<LatLonBox>
					<north>15.75414586576693</north>
					<south>14.45659647715154</south>
					<east>120.5822937595303</east>
					<west>119.9266291651254</west>
					<rotation>11.38639236059575</rotation>
				</LatLonBox>
			</GroundOverlay>
			<GroundOverlay>
				<name>T449</name>
				<color>bfffffff</color>
				<Icon>
					<href>files/T449_looked_new_1.png</href>
					<viewBoundScale>0.75</viewBoundScale>
				</Icon>
				<LatLonBox>
					<north>17.86690639894779</north>
					<south>15.90412358191775</south>
					<east>120.8686697108803</east>
					<west>120.2068745174927</west>
				</LatLonBox>
			</GroundOverlay>
			<GroundOverlay>
				<name>T448</name>
				<color>d9ffffff</color>
				<Icon>
					<href>files/T448_looked__0.png</href>
					<viewBoundScale>0.75</viewBoundScale>
				</Icon>
				<LatLonBox>
					<north>18.66507145440462</north>
					<south>17.40782761040167</south>
					<east>121.2488109797273</east>
					<west>120.3059686858346</west>
				</LatLonBox>
			</GroundOverlay>
			<GroundOverlay>
				<name>T447</name>
				<color>c4ffffff</color>
				<Icon>
					<href>files/T447_lks_1.png</href>
					<viewBoundScale>0.75</viewBoundScale>
				</Icon>
				<LatLonBox>
					<north>18.70864006944732</north>
					<south>17.74650167387772</south>
					<east>121.5787081293962</east>
					<west>120.8081385236172</west>
					<rotation>10.70706857593546</rotation>
				</LatLonBox>
			</GroundOverlay>
			<GroundOverlay>
				<name>T446</name>
				<color>b3ffffff</color>
				<Icon>
					<href>files/T446_looked_1.png</href>
					<viewBoundScale>0.75</viewBoundScale>
				</Icon>
				<LatLonBox>
					<north>18.58232883698486</north>
					<south>18.03619186901386</south>
					<east>122.1909725545675</east>
					<west>121.1813431664451</west>
				</LatLonBox>
			</GroundOverlay>
			<GroundOverlay>
				<name>T445</name>
				<color>99ffffff</color>
				<Icon>
					<href>files/T445_1.png</href>
					<viewBoundScale>0.75</viewBoundScale>
				</Icon>
				<LatLonBox>
					<north>18.59151624646935</north>
					<south>17.85024827548517</south>
					<east>122.390062325997</east>
					<west>121.8871964648126</west>
					<rotation>10.87596634750518</rotation>
				</LatLonBox>
			</GroundOverlay>
		</Folder>
		<Folder>
			<name>Geology</name>
			<GroundOverlay>
				<name>PHL MGB 1:1M Combined Bedrock and Superficial Geology and Age</name>
				<Snippet maxLines="0"></Snippet>
				<Icon>
					<href>http://onegeology-asia.org/ows/GSJ_MGB_Combined_Bedrock_and_Superficial_Geology_and_Age/wms?&amp;VERSION=1.1.1&amp;REQUEST=GetMap&amp;SERVICE=WMS&amp;FORMAT=image/png&amp;width=1024&amp;height=1024&amp;STYLES=&amp;TRANSPARENT=TRUE&amp;SRS=EPSG:4326&amp;LAYERS=PHL_MGB_1M_Combined_BLT_SLT_BA&amp;</href>
					<viewRefreshMode>onStop</viewRefreshMode>
					<viewRefreshTime>5</viewRefreshTime>
				</Icon>
				<LatLonBox>
					<north>21.99208946966948</north>
					<south>12.80007086543652</south>
					<east>130.7680357309249</east>
					<west>115.8202262859047</west>
				</LatLonBox>
			</GroundOverlay>
		</Folder>
		<Folder>
			<name>Black sand mining sites subsidence</name>
			<Placemark>
				<name>site15 dagupan - subs 4.6</name>
				<description>permit: 2007 approval
location: approximate</description>
				<LookAt>
					<longitude>120.3564180678714</longitude>
					<latitude>16.08760540285773</latitude>
					<altitude>0</altitude>
					<heading>-0.02596502686534631</heading>
					<tilt>4.833255677201948</tilt>
					<range>19339.53350561796</range>
					<gx:altitudeMode>relativeToSeaFloor</gx:altitudeMode>
				</LookAt>
				<styleUrl>#m_ylw-pushpin0304</styleUrl>
				<Point>
					<gx:drawOrder>1</gx:drawOrder>
					<coordinates>120.3327172881291,16.05194964718156,0</coordinates>
				</Point>
			</Placemark>
			<Placemark>
				<name>site13 sta lucia - subs 4.3</name>
				<description>permit: 2007 approval
location: approximate</description>
				<LookAt>
					<longitude>120.4354446807932</longitude>
					<latitude>17.11544409878391</latitude>
					<altitude>0</altitude>
					<heading>-0.004284236031120941</heading>
					<tilt>13.68315345099622</tilt>
					<range>2011.818476522759</range>
					<gx:altitudeMode>relativeToSeaFloor</gx:altitudeMode>
				</LookAt>
				<styleUrl>#m_ylw-pushpin0304</styleUrl>
				<Point>
					<gx:drawOrder>1</gx:drawOrder>
					<coordinates>120.4357905376105,17.1129033822566,0</coordinates>
				</Point>
			</Placemark>
			<Placemark>
				<name>site10 candon city - subsidence 3.0</name>
				<description>permit: 2007 approval
location: approximate</description>
				<LookAt>
					<longitude>120.4156630135168</longitude>
					<latitude>17.20637770365602</latitude>
					<altitude>0</altitude>
					<heading>-0.009194817919040572</heading>
					<tilt>23.05348950471011</tilt>
					<range>1441.238787525625</range>
					<gx:altitudeMode>relativeToSeaFloor</gx:altitudeMode>
				</LookAt>
				<styleUrl>#m_ylw-pushpin0304</styleUrl>
				<Point>
					<gx:drawOrder>1</gx:drawOrder>
					<coordinates>120.4156630135168,17.20637770365602,0</coordinates>
				</Point>
			</Placemark>
			<Placemark>
				<name>site8 - subs 1.6</name>
				<LookAt>
					<longitude>122.0522127466531</longitude>
					<latitude>14.90631009434067</latitude>
					<altitude>0</altitude>
					<heading>0.2513640723333226</heading>
					<tilt>27.40752730743568</tilt>
					<range>867832.5549246793</range>
					<gx:altitudeMode>relativeToSeaFloor</gx:altitudeMode>
				</LookAt>
				<styleUrl>#m_ylw-pushpin0304</styleUrl>
				<Point>
					<gx:drawOrder>1</gx:drawOrder>
					<coordinates>119.914147,15.62354166666667,0</coordinates>
				</Point>
			</Placemark>
			<Placemark>
				<name>site4 - subs 1.3</name>
				<LookAt>
					<longitude>122.0522127466531</longitude>
					<latitude>14.90631009434067</latitude>
					<altitude>0</altitude>
					<heading>0.2513640723333226</heading>
					<tilt>27.40752730743568</tilt>
					<range>867832.5549246793</range>
					<gx:altitudeMode>relativeToSeaFloor</gx:altitudeMode>
				</LookAt>
				<styleUrl>#m_ylw-pushpin0304</styleUrl>
				<Point>
					<gx:drawOrder>1</gx:drawOrder>
					<coordinates>120.280616,14.98178333333333,0</coordinates>
				</Point>
			</Placemark>
			<Placemark>
				<name>site2 - subs 4.3</name>
				<LookAt>
					<longitude>122.0522127466531</longitude>
					<latitude>14.90631009434067</latitude>
					<altitude>0</altitude>
					<heading>0.2513640723333226</heading>
					<tilt>27.40752730743568</tilt>
					<range>867832.5549246793</range>
					<gx:altitudeMode>relativeToSeaFloor</gx:altitudeMode>
				</LookAt>
				<styleUrl>#m_ylw-pushpin0304</styleUrl>
				<Point>
					<gx:drawOrder>1</gx:drawOrder>
					<coordinates>120.230655,16.03616666666667,0</coordinates>
				</Point>
			</Placemark>
		</Folder>
		<Folder>
			<name>Black sand mining sites no coherence</name>
			<Placemark>
				<name>site18 sanchez mira - no coherence</name>
				<description>permit: 2007 approval
location: approximate</description>
				<LookAt>
					<longitude>121.2333830014473</longitude>
					<latitude>18.56664813951976</latitude>
					<altitude>0</altitude>
					<heading>0.0001766794893969102</heading>
					<tilt>9.157617669750111</tilt>
					<range>5643.709253603312</range>
					<gx:altitudeMode>relativeToSeaFloor</gx:altitudeMode>
				</LookAt>
				<styleUrl>#m_ylw-pushpin03041</styleUrl>
				<Point>
					<gx:drawOrder>1</gx:drawOrder>
					<coordinates>121.2477650635915,18.56602702988886,0</coordinates>
				</Point>
			</Placemark>
			<Placemark>
				<name>site 12 - no coherence</name>
				<description>permit: 2007 approval
location: approximate</description>
				<LookAt>
					<longitude>120.4992033140925</longitude>
					<latitude>18.04970411011215</latitude>
					<altitude>0</altitude>
					<heading>-0.005416877841772532</heading>
					<tilt>13.94518566566786</tilt>
					<range>8068.177796444072</range>
					<gx:altitudeMode>relativeToSeaFloor</gx:altitudeMode>
				</LookAt>
				<styleUrl>#m_ylw-pushpin03042</styleUrl>
				<Point>
					<gx:drawOrder>1</gx:drawOrder>
					<coordinates>120.4834412476766,18.06101342375548,0</coordinates>
				</Point>
			</Placemark>
			<Placemark>
				<name>site7 - no coherence</name>
				<LookAt>
					<longitude>122.0522127466531</longitude>
					<latitude>14.90631009434067</latitude>
					<altitude>0</altitude>
					<heading>0.2513640723333226</heading>
					<tilt>27.40752730743568</tilt>
					<range>867832.5549246793</range>
					<gx:altitudeMode>relativeToSeaFloor</gx:altitudeMode>
				</LookAt>
				<styleUrl>#m_ylw-pushpin03042</styleUrl>
				<Point>
					<gx:drawOrder>1</gx:drawOrder>
					<coordinates>121.829479,18.29110833333333,0</coordinates>
				</Point>
			</Placemark>
			<Placemark>
				<name>site6 -no coherence</name>
				<LookAt>
					<longitude>122.0522127466531</longitude>
					<latitude>14.90631009434067</latitude>
					<altitude>0</altitude>
					<heading>0.2513640723333226</heading>
					<tilt>27.40752730743568</tilt>
					<range>867832.5549246793</range>
					<gx:altitudeMode>relativeToSeaFloor</gx:altitudeMode>
				</LookAt>
				<styleUrl>#m_ylw-pushpin03042</styleUrl>
				<Point>
					<gx:drawOrder>1</gx:drawOrder>
					<coordinates>122.014997,18.29310555555556,0</coordinates>
				</Point>
			</Placemark>
			<Placemark>
				<name>site5 - no coherence</name>
				<LookAt>
					<longitude>122.0522127466531</longitude>
					<latitude>14.90631009434067</latitude>
					<altitude>0</altitude>
					<heading>0.2513640723333226</heading>
					<tilt>27.40752730743568</tilt>
					<range>867832.5549246793</range>
					<gx:altitudeMode>relativeToSeaFloor</gx:altitudeMode>
				</LookAt>
				<styleUrl>#m_ylw-pushpin03042</styleUrl>
				<Point>
					<gx:drawOrder>1</gx:drawOrder>
					<coordinates>121.675024,18.27423888888889,0</coordinates>
				</Point>
			</Placemark>
			<Placemark>
				<name>site3 - no coherence</name>
				<LookAt>
					<longitude>122.0522127466531</longitude>
					<latitude>14.90631009434067</latitude>
					<altitude>0</altitude>
					<heading>0.2513640723333226</heading>
					<tilt>27.40752730743568</tilt>
					<range>867832.5549246793</range>
					<gx:altitudeMode>relativeToSeaFloor</gx:altitudeMode>
				</LookAt>
				<styleUrl>#m_ylw-pushpin03042</styleUrl>
				<Point>
					<gx:drawOrder>1</gx:drawOrder>
					<coordinates>121.92009,18.94823611111111,0</coordinates>
				</Point>
			</Placemark>
			<Placemark>
				<name>site1 - no coherence</name>
				<LookAt>
					<longitude>-107.4039984185564</longitude>
					<latitude>41.51055193019549</latitude>
					<altitude>0</altitude>
					<heading>0.06901033865538926</heading>
					<tilt>31.49676222947625</tilt>
					<range>1973278.585926163</range>
					<gx:altitudeMode>relativeToSeaFloor</gx:altitudeMode>
				</LookAt>
				<styleUrl>#m_ylw-pushpin03042</styleUrl>
				<Point>
					<gx:drawOrder>1</gx:drawOrder>
					<coordinates>120.3569444444444,17.54361111111111,0</coordinates>
				</Point>
			</Placemark>
		</Folder>
	</Folder>
</Document>
</kml>
