# Supplementary material
Source: MDPI journal article supplement (https://www.mdpi.com/2072-4292/8/2/100)

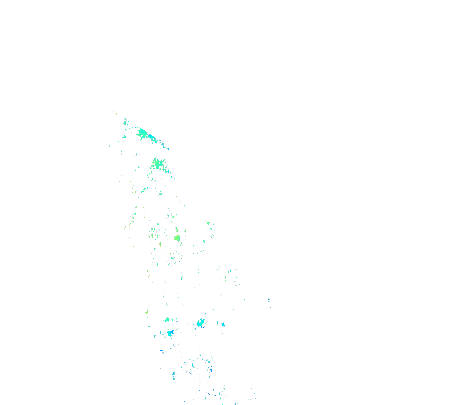

Supplement: s1 [file s1 › files/T446_looked_1.png]

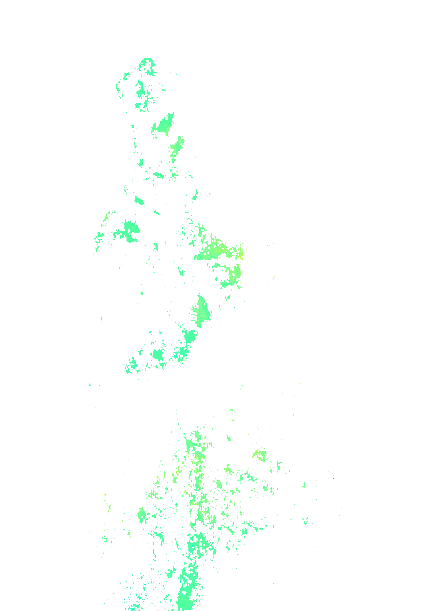

Supplement: s1 [file s1 › files/T448_looked__0.png]

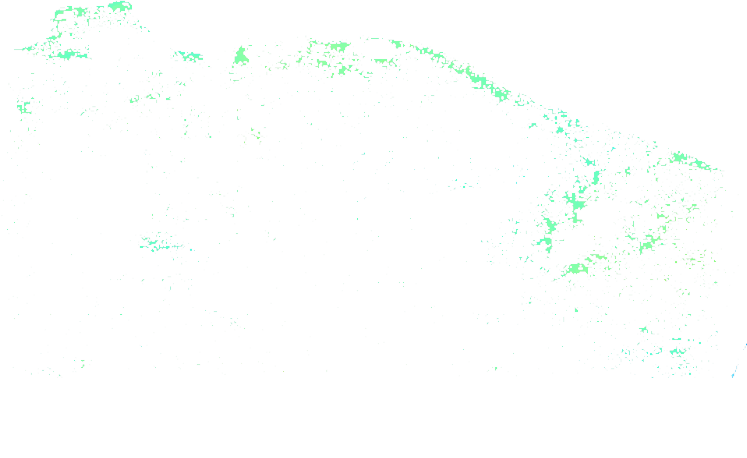

Supplement: s1 [file s1 › files/T447_lks_1.png]

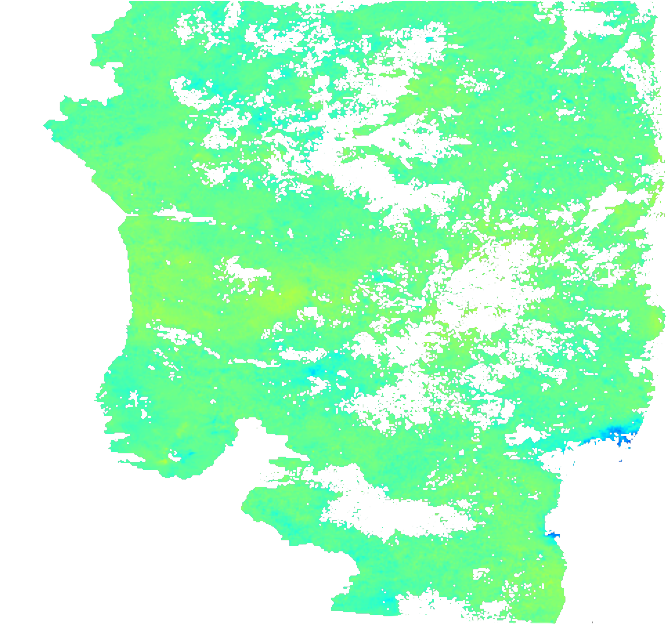

Supplement: s1 [file s1 › files/T450_1.png]

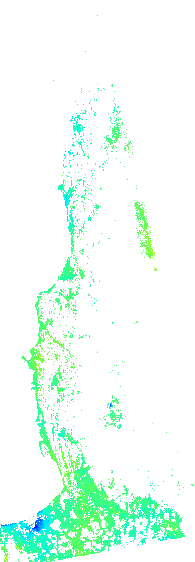

Supplement: s1 [file s1 › files/T449_looked_new_1.png]

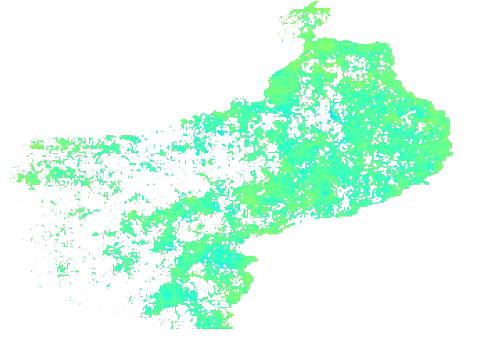

Supplement: s1 [file s1 › files/T445_1.png]
